# Supplementary material
Source: PubMed Central journal article supplement (PMC8011639)
Supplement: mmc1.pdf [file mmc1.pdf]

**Med, Volume 2**

**Supplemental information**

**Simultaneous detection and mutation surveillance  
of SARS-CoV-2 and multiple respiratory viruses  
by rapid field-deployable sequencing**

**Chongwei Bi, Gerardo Ramos-Mandujano, Yeteng Tian, Sharif Hala, Jinna Xu, Sara Mfarrej, Concepcion Rodriguez Esteban, Estrella Nuñez Delicado, Fadwa S. Alofi, Asim Khogeer, Anwar M. Hashem, Naif A.M. Almontashiri, Arnab Pain, Juan Carlos Izpisua Belmonte, and Mo Li**

## Supplemental items for

### **Simultaneous Detection and Mutation Surveillance of SARS-CoV-2 and co-infections of multiple respiratory viruses by Rapid field-deployable sequencing**

Authors: Chongwei Bi, Gerardo Ramos-Mandujano, Yeteng Tian, Sharif Hala, Jinna Xu, Sara Mfarrej, Concepcion Rodriguez Esteban, Estrella Nuñez Delicado, Fadwa S. Alofi, Asim Khogeer, Anwar M. Hashem, Naif A.M. Almontashiri, Arnab Pain, Juan Carlos Izpisua Belmonte, Mo Li

#### **This PDF file includes:**

Figs. S1, S2

Tables S1, S2

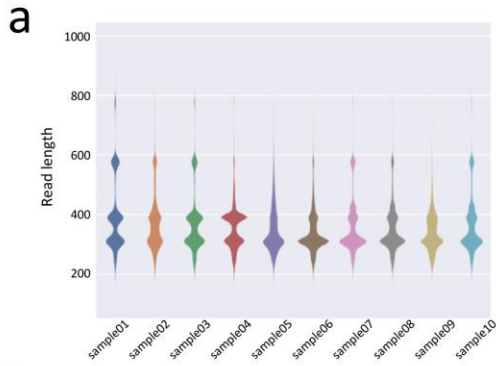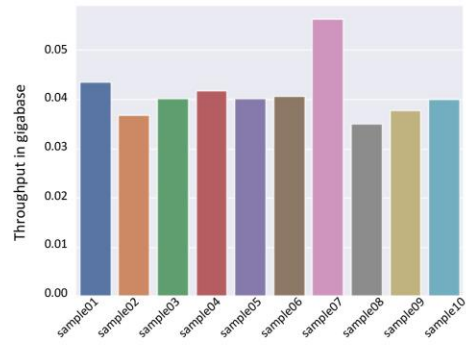

**b**

| Read number per amplicon |         |        |        |        |         |
|--------------------------|---------|--------|--------|--------|---------|
| sample                   | Pair 13 | Pair 5 | Pair 9 | Pair 4 | Pair 10 |
| sample01                 | 34401   | 24945  | 2287   | 66325  | 41788   |
| sample02                 | 20938   | 1043   | 29     | 20735  | 11830   |
| sample03                 | 32322   | 9850   | 332    | 51450  | 22589   |
| sample04                 | 37847   | 6151   | 3379   | 81953  | 3586    |
| sample05                 | 27862   | 1503   | 668    | 6248   | 438     |
| sample06                 | 59638   | 10427  | 1920   | 17949  | 3992    |
| sample07                 | 63907   | 21127  | 22480  | 38411  | 26992   |
| sample08                 | 32394   | 14967  | 8632   | 23044  | 8291    |
| sample09                 | 34126   | 1569   | 651    | 10686  | 481     |
| sample10                 | 27783   | 17773  | 13889  | 27925  | 18077   |

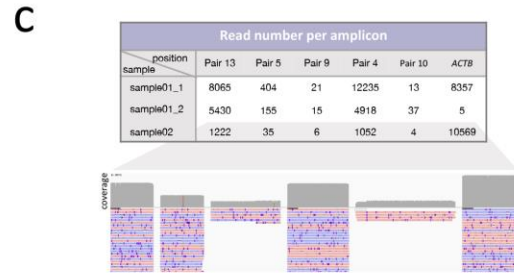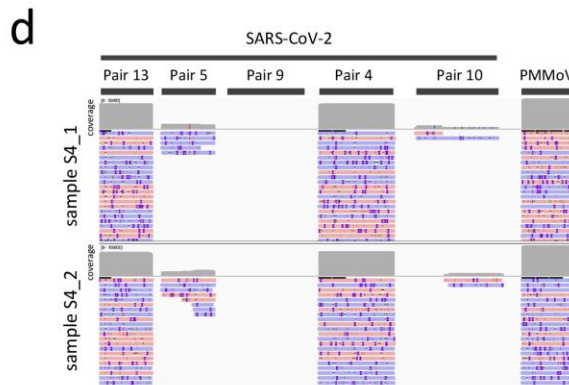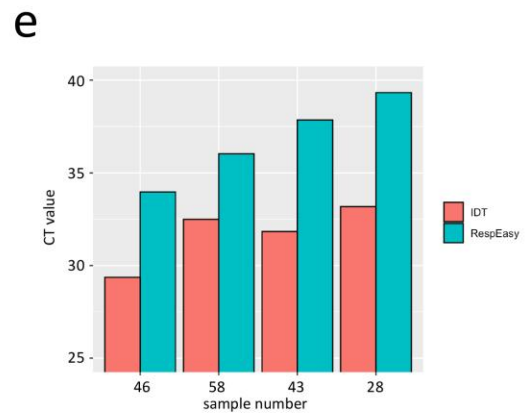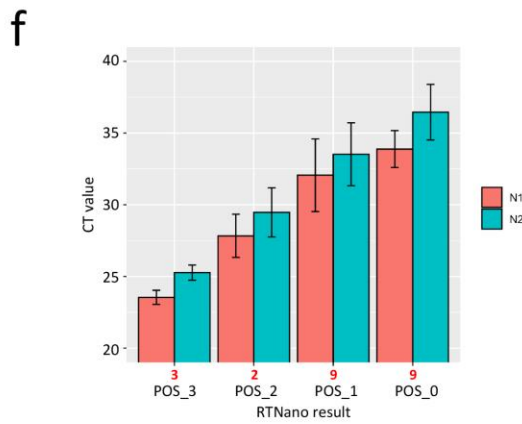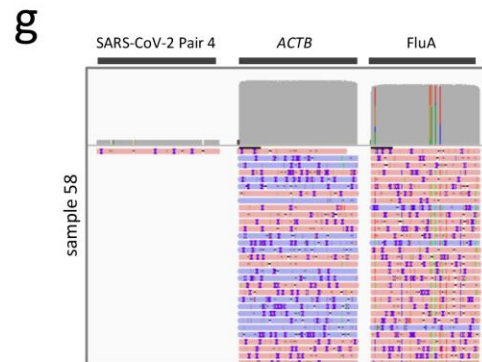

**Figure S1. Sequencing analysis of multiplex RPA, Related to Figure 1.**

- a**, The read length distribution and throughput of ten SAR-CoV-2<sup>+</sup> sample sequencing.
- b**, The read number for each amplicon in the sequencing of ten SAR-CoV-2<sup>+</sup> samples. All amplicons were covered by reads.
- c**, The read number for each amplicon in the trial sequencing of multiplex RPA of SARS-CoV-2 and *ACTB*. Sample 01 is used as RPA template to determine the primer concentration in two trials (sample01\_1 and sample01\_2). Sample 02 is used in a repeat trial using the same primer mix as sample01\_2.
- d**, The IGV alignment plot showing robust amplification of PMMoV with SARS-CoV-2. A SARS-CoV-2<sup>+</sup> sample (S4) was used as input sample in two trials with different primer concentration.
- e**, The CT values of FluA<sup>+</sup> samples in Resp'Easy<sup>TM</sup> and IDT FluA assays.
- f**, The average rRT-PCR CT values of SARS-CoV-2 RTNano<sup>+</sup> samples (PCR<sup>+</sup> of both N1 and N2 primers) of different confidence level using 7-amplicon NIRVANA.
- g**, IGV plots showing the read alignment to SARS-CoV-2, *ACTB* and FluA amplicon in sample 58 using 7-amplicon NIRVANA.

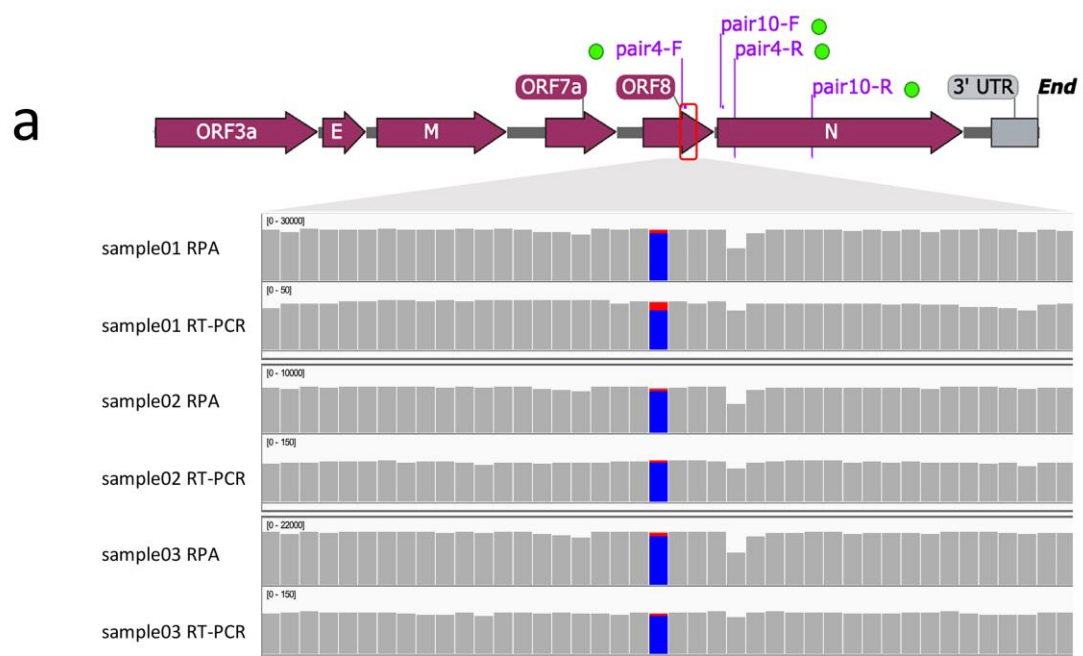

**b**

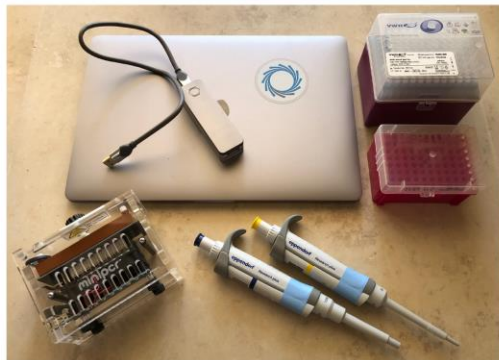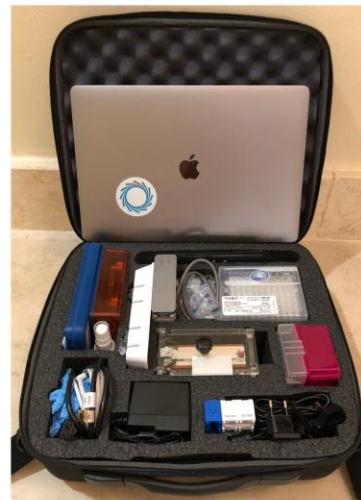

**Figure S2. Validation of SNVs detected by NIRVANA, Related to Figure 3.**

**a,** IGV plots showing the nt28144 T/C SNV in samples 01-03 from RPA and RT-PCR Nanopore sequencing. The blue bar represents the C base while the red bar represents the T base. All of the 3 SNVs detected in RPA sequencing were confirmed by RT-PCR amplicon sequencing.

**b,** Equipment used in NIRVANA. The whole workflow can be done with one laptop, one Nanopore MinION sequencer, two pipettes, two boxes of pipette tips, and a heating block (using a miniPCR™ mini16 here). All equipment can be packed into a suitcase.

**Table S1. Primers used in this study, Related to Figure 1 and RPA sections in STAR Methods.**

| <b>Primer</b> | <b>Sequence</b>                    | <b>Amplicon Size</b> | <b>Primer Amount</b> |
|---------------|------------------------------------|----------------------|----------------------|
| pair4-F       | GCTGGTTCTAAATCACCCATTCACT          | 273 bp               | 6 $\mu$ l            |
| pair4-R       | TCTGGTACTGCCAGTTGAATCTG            |                      |                      |
| pair5-F       | TTGGGATCAGACATACCACCCA             | 194 bp               | 9 $\mu$ l            |
| pair5-R       | CAACACCTAGCTCTCTGAAGTGG            |                      |                      |
| pair9-F       | CCAGCAACTGTTTGTGGACCT              | 309 bp               | 12 $\mu$ l           |
| pair9-R       | AGCAACAGGGACTTCTGTGC               |                      |                      |
| pair10-F      | GACCCCAAATCAGCGAAAT                | 394 bp               | 12 $\mu$ l           |
| pair10-R      | TGTAGCACGATTGCAGCATTG              |                      |                      |
| pair13-F      | CCAGAGTACTCAATGGTCTTTGTTC          | 195 bp               | 6 $\mu$ l            |
| pair13-R      | ACCCAAGTAGCAGGCATATAGAC            |                      |                      |
| ACTB-F        | CCCAGCCATGTACGTTGCTATCCAGGC        | 263 bp               | 4 $\mu$ l            |
| ACTB-R        | ACAGCTTCTCCTTAATGTCACGCACGAT       |                      |                      |
| influa-F      | ATGAGYCTTYTAACCGAGGTGCGAAACG       | 244 bp               | 12 $\mu$ l           |
| influa-R      | TGGACAAANCGTCTACGCTGCAG            |                      |                      |
| HAdVs-F       | GCCGAGAAGGGCGTGCGCAGGTA            | 161 bp               | 9 $\mu$ l            |
| HAdVs-R       | TACGCCAACTCCGCCACGCGCT             |                      |                      |
| HCoV-F        | ATGGTCAAGGAGTTCCCATTGCTTTCGGAGTA   | 151 bp               | 9 $\mu$ l            |
| HCoV-R        | GGGCCGGTACCGAGATAGTAGAAATACCATCTCG |                      |                      |

**Table S2. Sample classification rules in RTNano analysis, Related to Figure 3.**

| <b>Mark</b>   | <b>Condition</b>                                                                            |
|---------------|---------------------------------------------------------------------------------------------|
| POS_3         | 3 regions $\geq$ 50 records                                                                 |
| POS_2         | 2 regions $\geq$ 50 records<br>OR 1 region $\geq$ 50 records and 2 regions $\geq$ 5         |
| POS_1         | 1 region $\geq$ 20 records<br>OR 2 regions $\geq$ 5 records<br>OR 3 regions $\geq$ 1 record |
| POS_0         | only 1 region $\geq$ 1 and $<$ 20 records<br>or only 2 regions $\geq$ 1 and $<$ 5 records   |
| NEG           | all regions = 0 record<br>AND ACTB $\geq$ 1000 records                                      |
| UNK (unknown) | all regions = 0 record<br>AND ACTB $\leq$ 1000 records                                      |
